# Supplementary material
Source: PubMed Central journal article supplement (PMC8718191)
Supplement: mjab068_supplementary_data.pdf [file mjab068_supplementary_data.pdf]

## 1 **Supplementary materials and methods**

### 2 **Cells and virus**

3 HEK293 (ATCC, CRL-1573) and Vero E6 cells (ATCC, CRL-1586) were maintained  
4 in Eagle's minimum essential medium supplemented with 10% fetal bovine serum  
5 (FBS) at 37 °C in a humidified atmosphere with 5% CO<sub>2</sub>. HEK293T (ATCC,  
6 CRL-11268) cells were cultured in Dulbecco's modified Eagle's medium.  
7 HEK293-ACE2 cell line was generated by transduction of lentiviral vector expressing  
8 ACE2 and subsequent monoclonal screening as described below. SARS-CoV-2  
9 (nCoV-2019BetaCoV/Wuhan/WIV04/2019) was isolated from the clinical sample [1].  
10 The propagation and titer determination of SARS-CoV-2 were performed in Vero E6  
11 cells in a biosafety level-3 (BSL-3) laboratory of National Biosafety Laboratory,  
12 Wuhan, Chinese Academy of Sciences [1].

13

### 14 **Plasmids**

15 Open reading frame (ORF) encoding NSP13 was amplified by RT-PCR from  
16 SARS-CoV-2 genomic RNA and cloned into the pCAGGSP7 vector without or with  
17 HA or S tag (Stag) [2-4]. Truncated NSP13 and SOCS1 expression plasmids were  
18 constructed into pCAGGSP7 vector with C-terminal HA tag by standard molecular  
19 biology methods. S or HA-tagged STAT1 expression plasmids were constructed as  
20 previously described [3, 5-7]. Human angiotensin I-converting enzyme-2 (ACE2)  
21 expression plasmid (pLVX-IRES-PURO-ACE2) was generated by cloning the ORF  
22 sequence of ACE2 into lentiviral vector pLVX-IRES-PURO. Luciferase reporter  
23 plasmids for type I, II, or III IFN-responsive promoters and the *Renilla* luciferase  
24 control plasmid (pRL-TK) were kindly provided by Prof. Hong-Bing Shu (Wuhan  
25 University) and were described previously [3, 6, 8-11].

26

### 27 **Antibodies and Reagents**

28 Primary antibodies include mouse antibody to HA tag (Sigma-Aldrich, 05-904) and  
29 rabbit antibodies to S tag (Abcam, ab18588),  $\beta$ -actin (ABclonal, AC026), NSP13

30 (AtaGenix, ATP238), STAT1 (Abcam, ab109320), pSTAT1 (Cell Signaling  
31 Technology, 9167S), IRAK1 (proteintech, 10478-2-AP), HAX1 (proteintech,  
32 11266-1-AP), DNAJA2 (ABclonal, A7059), HSPD1 (ABclonal, A0564), CCT4  
33 (ABclonal, A6548), CCT8 (ABclonal, A4449), and TCP1 (ABclonal, A1950). For  
34 Immunofluorescence assay (IFA), secondary antibodies include Alexa Fluor  
35 647-conjugated goat anti-rabbit IgG (H+L) (Abcam, ab150079) and Alexa Fluor  
36 488-conjugated goat anti-mouse IgG (H+L) (Abcam, ab150113). For WB analysis,  
37 secondary antibodies include horseradish peroxidase (HRP)-conjugated goat  
38 anti-mouse or anti-rabbit IgG antibodies (Abcam, ab6789 and ab6721). Recombinant  
39 human IFN- $\alpha$  (300-02AA), IFN- $\gamma$  (300-02), and IFN- $\lambda$  (300-02K) were all purchased  
40 from Peprtech.

41

#### 42 **Real-time qPCR**

43 Total RNA was extracted from the treated HEK293T cells with TRIzol reagent (NZK  
44 biotech, China). Reverse transcription of RNA was performed with a cDNA reverse  
45 transcription kit (TaKaRa, RR047A), followed by real-time quantitative PCR with an  
46 SYBR Green real-time PCR kit (TaKaRa, RR820A). The relative mRNA levels of the  
47 indicated genes were calculated using the  $2^{-\Delta\Delta CT}$  method with *GAPDH* mRNA levels  
48 as an internal control. Primers used have been described in previous studies [12-15].

49

#### 50 **Dual-luciferase reporter (DLR) gene assay**

51 HEK293T cells cultured in 96-well plates were cotransfected with 80 ng NSP13  
52 expression plasmid or the control vector, together with 20 ng ISRE (for type I and III  
53 IFN signaling analyses) or GAF reporter plasmid (for type II IFN signaling analysis)  
54 and 0.5 ng pRL-TK, using lipofectamine 3000 (Invitrogen) by following the  
55 manufacturer's instructions. At 24 h posttransfection, cells were mock stimulated or  
56 stimulated with IFN- $\alpha$  (type I IFN; 2000 u/ml), IFN- $\gamma$  (type II IFN; 100 ng/ml), or  
57 IFN- $\lambda$  (type III IFN; 200 ng/ml) for 16 h before measurements of luciferase activities  
58 with a DLR assay kit (Promega, E2940). The relative luciferase activities (Rel. Luc.  
59 Act) were exhibited by normalizing firefly luciferase activity to *Renilla* luciferase

60 activity.

61

### 62 **Generation of HEK293-ACE2 cell line**

63 HEK293T cells were co-transfected with the human ACE2 expression plasmid  
64 pLVX-IRES-PURO-ACE2 and packaging plasmids provided by Prof. Xinwen Chen  
65 (Wuhan Institute of Virology) for 48 h [14, 16]. Packaged lentiviral particles were  
66 then harvested from culture medium and used for transduction of HEK293 cells,  
67 followed by 3-day selection with 2 µg/mL puromycin. Then, cells were diluted and  
68 seeded into 96-well plates for further screening of single colony stably  
69 over-expressing ACE2.

70

### 71 **Protein interaction, silver staining, and WB analyses**

72 S-pulldown assays utilizing the high-specific and strong affinity of S tag with  
73 S-protein coupled on agarose beads were performed as described previously to  
74 analyze protein interactions [3, 5, 14, 17-19]. In cotransfection assays before  
75 S-pulldown, HEK293T cells were transfected with the S-tagged protein expression  
76 plasmids together with the plasmids encoding other indicated proteins for 36 h. For  
77 protein interaction analysis in the contexts of infection combined with transfection,  
78 HEK293-ACE2 cells were firstly transfected with the plasmid encoding STAT1-Stag  
79 or the control vector and at 12 h posttransfection, the cells were infected with  
80 SARS-CoV-2 (MOI = 1) for 24 h. Then, the transfected or SARS-CoV-2-infected  
81 cells expressing S-tagged proteins were lysed with the immunoprecipitation lysis  
82 buffer (Beyotime) and after centrifugation, supernatants of cell lysates were mixed  
83 with S-protein agarose (Millipore) by rotating incubation. The beads were next  
84 washed with the lysis buffer and phosphate-buffered saline (PBS) successively,  
85 followed by silver staining, WB, or quantitative MS analyses of the bound protein  
86 samples. For silver staining analysis, protein samples were eluted with 1×SDS  
87 sample buffer by boiling for 10min and subjected to 10% SDS polyacrylamide gel  
88 electrophoresis (SDS-PAGE). Then, the gel was fixed, sensitized, and stained by  
89 Pierce Silver Stain Kit (Thermo Fisher Scientific) according to the manufacturer's

90 instructions. For WB analysis, protein samples separated by SDS-PAGE were  
91 transferred onto polyvinylidene difluoride (PVDF) membranes. After blocking with  
92 5% BSA in Tris-buffered saline-Tween 20 (TBS-T), the membranes were incubated  
93 successively with primary antibodies and HRP-conjugated secondary antibodies.  
94 Protein bands were detected with an enhanced chemiluminescence kit (Thermo Fisher  
95 Scientific). In nuclease treatment assays, cell lysates (supplemented with 2 mM  
96 MgCl<sub>2</sub>) were divided into halves and then subjected to excessive treatment with  
97 Benzonase (100 U, Millipore, Cat#70746) or left untreated at 4°C for 4 h before  
98 S-pulldown as described previously [14].

99

### 100 **Quantitative MS analysis**

101 For MS quantification analysis, bead-bound proteins (in total of 6 samples from three  
102 biological replicates for both NSP13 pulldown and control groups) were denatured,  
103 reduced, alkylated, and eluted by one-step treatment in the reaction buffer (1%  
104 SDC/100 mM Tris-HCl, pH 8.5/10 mM TCEP/40 mM CAA) at 95 °C for 10 min. The  
105 eluates were diluted with equal volume of H<sub>2</sub>O and then subjected to trypsin digestion  
106 at 37 °C overnight. Obtained peptides were desalted for liquid  
107 chromatography-tandem mass spectrometry (LC-MS/MS) analysis using a Q Exactive  
108 HF-X system coupled with Easy-nLC 1200 (Thermo Fisher Scientific) [20]. MS raw  
109 tandem spectra were analyzed with MaxQuant (V1.6.6) (AB SCIEX) using the  
110 Andromeda database search algorithm [21]. Spectra files were searched against the  
111 Human Unified Protein Database (UniProt) [22]. The main parameters were as  
112 follows: LFQ mode was checked for quantification; Variable modifications, Oxidation  
113 (M) & Acetyl (Protein N-term); Fixed modifications, Carbamidomethyl (C);  
114 Digestion, Trypsin/P; Match between runs was used for identification transfer. Search  
115 results were filtered with 1% FDR at both protein and peptide levels. Significantly  
116 changed proteins were screened out according to the fold changes and p-values of the  
117 proteins. In this study, criteria with a *p*-value < 0.05 and fold change > 2 were taken  
118 for selection of NSP13-interacting proteins.

119

120 **Bioinformatic analysis of Gene Ontology (GO) and protein-protein interaction**  
121 **(PPI) network and data mining of druggable targets and host-directing drugs**

122 STRING database (Version 11.0) was used to evaluate the potential interactions of the  
123 identified cellular proteins and to group proteins into similar functional classes [23].  
124 The protein-protein interaction (PPI) network was then visualized using Cytoscape  
125 software (Version 3.8) [24]. By STRING analysis, 830 interactions (edges) are  
126 represented in the protein-protein interaction network of the present study. Gene  
127 ontology (GO) analysis was used to determine the cellular component (CC),  
128 molecular function (MF) and biological process (BP) attributes of the identified  
129 NSP13-interacting cellular proteins by using the enricher function of clusterProfiler  
130 package in R with default parameters [25]. Significant GO terms (adjusted  $p < 0.05$ )  
131 were identified and further refined by the simplify method (cutoff = 0.6,  
132 by="p.adjust") to cut redundant gene sets.

133 Cellular NSP13-interacting proteins may positively or negatively regulate NSP13  
134 function (hence bolstering or inhibiting viral infection), or in turn, may be affected by  
135 NSP13, leading to viral fitness or cellular dysfunction. Thus, the NSP13-cell  
136 interaction interface could be a promising target to intervene viral infection and  
137 pathogenesis. To explore potential druggable targets, the identified NSP13-interacting  
138 proteins were searched against DrugBank database [26]. Of the 172 cellular proteins  
139 interacting with NSP13 with high significance, 45 were returned with 95 targeting  
140 drugs (50 approved, 33 experimental, 10 investigational, and 2 nutraceutical). The  
141 cellular target-drugs network was then visualized with Cytoscape software [24].

142

143 **Immunofluorescence and confocal microscopy**

144 Cells were fixed with 4% paraformaldehyde in PBS for 10 min and permeabilized  
145 with 0.5% Triton X-100 in PBS. After blocking with 2.5% BSA and 2.5% normal goat  
146 serum in PBS, cells were incubated with primary antibodies overnight at 4 °C and  
147 then stained with secondary antibodies for 1 h at room temperature (RT). To visualize  
148 the nuclei, cells were treated with Hoechst 33258 (Beyotime) for 10 min at RT. Image  
149 acquisition and analyses were performed with a Nikon Ti confocal microscopy with

150 the Volocity software (PerkinElmer).

151

## 152 **Statistical analysis**

153 Statistical analyses were performed by GraphPad Prism 8 using unpaired two-tailed *t*  
154 test or Welch's *t* test. Data were expressed as mean  $\pm$  SD, *n* = 3 or 4 biological  
155 replicates as indicated. *p* < 0.05 was considered statistically significant.

156

## 157 **References**

- 158 1. **Zhou, P., X.-L. Yang, X.-G. Wang, B. Hu, L. Zhang, W. Zhang, H.-R. Si, Y. Zhu, B. Li, C.-L. Huang,**  
159 **H.-D. Chen, J. Chen, Y. Luo, H. Guo, R.-D. Jiang, M.-Q. Liu, Y. Chen, X.-R. Shen, X. Wang, X.-S.**  
160 **Zheng, K. Zhao, Q.-J. Chen, F. Deng, L.-L. Liu, B. Yan, F.-X. Zhan, Y.-Y. Wang, G.-F. Xiao, and**  
161 **Z.-L. Shi.** 2020. A pneumonia outbreak associated with a new coronavirus of probable bat  
162 origin. *Nature*.
- 163 2. **Ning, Y.-J., M. Wang, M. Deng, S. Shen, W. Liu, W.-C. Cao, F. Deng, Y.-Y. Wang, Z. Hu, and H.**  
164 **Wang.** 2014. Viral suppression of innate immunity via spatial isolation of TBK1/IKKepsilon  
165 from mitochondrial antiviral platform. *J. Mol. Cell. Biol.* **6**:324-337.
- 166 3. **Ning, Y.-J., K. Feng, Y.-Q. Min, W.-C. Cao, M. Wang, F. Deng, Z. Hu, and H. Wang.** 2015.  
167 Disruption of type I interferon signaling by the nonstructural protein of severe fever with  
168 thrombocytopenia syndrome virus via the hijacking of STAT2 and STAT1 into inclusion bodies.  
169 *J. Virol.* **89**:4227-4236.
- 170 4. **Ning, Y.-J., Z. Kang, J. Xing, Y.-Q. Min, D. Liu, K. Feng, M. Wang, F. Deng, Y. Zhou, Z. Hu, and**  
171 **H. Wang.** 2018. Ebola virus mucin-like glycoprotein (Emuc) induces remarkable acute  
172 inflammation and tissue injury: evidence for Emuc pathogenicity in vivo. *Protein & cell*  
173 **9**:389-393.
- 174 5. **Feng, K., F. Deng, Z. Hu, H. Wang, and Y.-J. Ning.** 2019. Heartland virus antagonizes type I and  
175 III interferon antiviral signaling by inhibiting phosphorylation and nuclear translocation of  
176 STAT2 and STAT1. *The Journal of biological chemistry* **294**:9503-9517.
- 177 6. **Ning, Y.-J., Q. Mo, K. Feng, Y.-Q. Min, M. Li, D. Hou, C. Peng, X. Zheng, F. Deng, Z. Hu, and H.**  
178 **Wang.** 2019. Interferon-gamma-Directed Inhibition of a Novel High-Pathogenic Phlebovirus  
179 and Viral Antagonism of the Antiviral Signaling by Targeting STAT1. *Front. Immunol.* **10**:1182.
- 180 7. **Min, Y.-Q., C. Shi, T. Yao, K. Feng, Q. Mo, F. Deng, H. Wang, and Y.-J. Ning.** 2020. The  
181 Nonstructural Protein of Guertu Virus Disrupts Host Defenses by Blocking Antiviral Interferon  
182 Induction and Action. *ACS Infect Dis* **6**:857-870.
- 183 8. **Ran, Y., J. Zhang, L.-L. Liu, Z.-Y. Pan, Y. Nie, H.-Y. Zhang, and Y.-Y. Wang.** 2016.  
184 Autoubiquitination of TRIM26 links TBK1 to NEMO in RLR-mediated innate antiviral immune  
185 response. *J Mol Cell Biol* **8**:31-43.
- 186 9. **Li, Y., R. Chen, Q. Zhou, Z. Xu, C. Li, S. Wang, A. Mao, X. Zhang, W. He, and H.-B. Shu.** 2012.  
187 LSm14A is a processing body-associated sensor of viral nucleic acids that initiates cellular  
188 antiviral response in the early phase of viral infection. *Proc Natl Acad Sci U S A*  
189 **109**:11770-11775.

- 190 10. **Wang, Y. Y., L. J. Liu, B. Zhong, T. T. Liu, Y. Li, Y. Yang, Y. Ran, S. Li, P. Tien, and H. B. Shu.** 2010.  
191 WDR5 is essential for assembly of the VISA-associated signaling complex and virus-triggered  
192 IRF3 and NF-kappaB activation. *Proc Natl Acad Sci U S A* **107**:815-820.
- 193 11. **Zhong, B., Y. Yang, S. Li, Y. Y. Wang, Y. Li, F. Diao, C. Lei, X. He, L. Zhang, P. Tien, and H. B. Shu.**  
194 2008. The adaptor protein MITA links virus-sensing receptors to IRF3 transcription factor  
195 activation. *Immunity* **29**:538-550.
- 196 12. **Ning, Y. J., Q. Mo, K. Feng, Y. Q. Min, M. Y. Li, D. H. Hou, C. Peng, X. Zheng, F. Deng, Z. H. Hu,  
197 and H. L. Wang.** 2019. Interferon-gamma-Directed Inhibition of a Novel High-Pathogenic  
198 Phlebovirus and Viral Antagonism of the Antiviral Signaling by Targeting STAT1. *Front  
199 Immunol* **10**.
- 200 13. **Ning, Y. J., K. Feng, Y. Q. Min, W. C. Cao, M. Wang, F. Deng, Z. Hu, and H. Wang.** 2015.  
201 Disruption of type I interferon signaling by the nonstructural protein of severe fever with  
202 thrombocytopenia syndrome virus via the hijacking of STAT2 and STAT1 into inclusion bodies.  
203 *J Virol* **89**:4227-4236.
- 204 14. **Mo, Q., Z. Xu, F. Deng, H. Wang, and Y.-J. Ning.** 2020. Host restriction of emerging  
205 high-pathogenic bunyaviruses via MOV10 by targeting viral nucleoprotein and blocking  
206 ribonucleoprotein assembly. *PLoS Pathog* **16**:e1009129.
- 207 15. **Ning, Y. J., K. Feng, Y. Q. Min, F. Deng, Z. H. Hu, and H. L. Wang.** 2017. Heartland virus NSs  
208 protein disrupts host defenses by blocking the TBK1 kinase-IRF3 transcription factor  
209 interaction and signaling required for interferon induction. *J Biol Chem* **292**:16722-16733.
- 210 16. **Min, Y.-Q., Y.-J. Ning, H. Wang, and F. Deng.** 2020. A RIG-I-like receptor directs antiviral  
211 responses to a bunyavirus and is antagonized by virus-induced blockade of TRIM25-mediated  
212 ubiquitination. *The Journal of biological chemistry* **295**:9691-9711.
- 213 17. **Hall, E. H., J. L. Balsbaugh, K. L. Rose, J. Shabanowitz, D. F. Hunt, and D. L. Brautigan.** 2010.  
214 Comprehensive analysis of phosphorylation sites in Tensin1 reveals regulation by p38MAPK.  
215 *Mol Cell Proteomics* **9**:2853-2863.
- 216 18. **Ning, Y.-J., K. Feng, Y.-Q. Min, F. Deng, Z. Hu, and H. Wang.** 2017. Heartland virus NSs protein  
217 disrupts host defenses by blocking the TBK1 kinase-IRF3 transcription factor interaction and  
218 signaling required for interferon induction. *The Journal of biological chemistry*  
219 **292**:16722-16733.
- 220 19. **Belgnaoui, S. M., S. Paz, S. Samuel, M.-L. Goulet, Q. Sun, M. Kikkert, K. Iwai, I. Dikic, J.  
221 Hiscott, and R. Lin.** 2012. Linear ubiquitination of NEMO negatively regulates the interferon  
222 antiviral response through disruption of the MAVS-TRAF3 complex. *Cell Host Microbe*  
223 **12**:211-222.
- 224 20. **Kelstrup, C. D., D. B. Bekker-Jensen, T. N. Arrey, A. Hoglebe, A. Harder, and J. V. Olsen.** 2018.  
225 Performance Evaluation of the Q Exactive HF-X for Shotgun Proteomics. *J Proteome Res*  
226 **17**:727-738.
- 227 21. **Cox, J., M. Y. Hein, C. A. Lubner, I. Paron, N. Nagaraj, and M. Mann.** 2014. Accurate  
228 proteome-wide label-free quantification by delayed normalization and maximal peptide ratio  
229 extraction, termed MaxLFQ. *Mol Cell Proteomics* **13**:2513-2526.
- 230 22. **TheUniProtConsortium.** 2017. UniProt: the universal protein knowledgebase. *Nucleic Acids  
231 Res* **45**:D158-D169.
- 232 23. **Szklarczyk, D., A. L. Gable, D. Lyon, A. Junge, S. Wyder, J. Huerta-Cepas, M. Simonovic, N. T.  
233 Doncheva, J. H. Morris, P. Bork, L. J. Jensen, and C. v. Mering.** 2019. STRING v11:

234 protein-protein association networks with increased coverage, supporting functional  
235 discovery in genome-wide experimental datasets. *Nucleic Acids Res* **47**:D607-D613.

236 24. **Shannon, P., A. Markiel, O. Ozier, N. S. Baliga, J. T. Wang, D. Ramage, N. Amin, B.**  
237 **Schwikowski, and T. Ideker.** 2003. Cytoscape: a software environment for integrated models  
238 of biomolecular interaction networks. *Genome Res* **13**:2498-2504.

239 25. **Yu, G., L.-G. Wang, Y. Han, and Q.-Y. He.** 2012. clusterProfiler: an R package for comparing  
240 biological themes among gene clusters. *Omics* **16**:284-287.

241 26. **Wishart, D. S., Y. D. Feunang, A. C. Guo, E. J. Lo, A. Marcu, J. R. Grant, T. Sajed, D. Johnson, C.**  
242 **Li, Z. Sayeeda, N. Assempour, I. Iynkkaran, Y. Liu, A. Maciejewski, N. Gale, A. Wilson, L. Chin,**  
243 **R. Cummings, D. Le, A. Pon, C. Knox, and M. Wilson.** 2018. DrugBank 5.0: a major update to  
244 the DrugBank database for 2018. *Nucleic Acids Res* **46**:D1074-D1082.

245
